# Supplementary material for: Remodeling of the Metabolome during Early Frog Development
Source: PLoS One. 2011 Feb 4;6(2):e16881. doi: 10.1371/journal.pone.0016881 (PMC3035664; doi:10.1371/journal.pone.0016881)
Supplement: Table S1 — Metabolite levels expressed relative to the average value measured for that metabolite in the egg samples. On three different days, three different male/female pairs were bred in vitro to obtain clutches of unfertilized eggs (time = 0) and early embryos at various times post-fertilization (pf) at18°C. Single eggs or embryos were rapidly quenched, extracted, and subjected to metabolomic analysis. The ratios were calculated separately for the three different clutches. For each time point average and standard deviation values of n = 3–4 are reported. (XLS) [file pone.0016881.s006.xls]

## Sheet: Sheet1
Data presented in Figure 1A.
	Average																			Standard Deviation
	Clutch one						Clutch two						Clutch three							Clutch one						Clutch two						Clutch three
	1-1 Average	1-2 Average	1-3 Average	1-4 Average	1-5 Average	1-6 Average	2-1 Average	2-2 Average	2-3 Average	2-4 Average	2-5 Average	2-6 Average	3-1 Average	3-2 Average	3-3 Average	3-4 Average	3-5 Average	3-6 Average		1-1 SD	1-2 SD	1-3 SD	1-4 SD	1-5 SD	1-6 SD	2-1 SD	2-2 SD	2-3 SD	2-4 SD	2-5 SD	2-6 SD	3-1 SD	3-2 SD	3-3 SD	3-4 SD	3-5 SD	3-6 SD
Time (min)	0	150	270	420	540	660	5	155	275	425	545	665	10	160	280	430	550	670		0	150	270	420	540	660	5	155	275	425	545	665	10	160	280	430	550	670
choline	-0.00335135	0.0571601	0.03182	-0.409482	-0.803567	-0.915417	-0.0157509	-0.00132135	-0.631524	-1.1346	-1.044	-3.09207	-0.0818775	-0.798885	-3.05103	-2.77163	-4.54102	-4.91427		0.11446	0.0535155	0.161417	0.216819	0.505564	0.0444474	0.264932	0.250606	0.786671	0.344924	0.274687	0.378151	0.574835	0.686365	2.13408	1.07641	1.00576	0.502238
serine	-0.017658	-0.43717	-0.257229	0.314339	1.16286	1.39867	-0.0137803	0.905686	0.727238	1.13229	1.73122	1.36894	-0.0379275	0.123657	0.177511	0.80631	0.886962	0.754113		0.265727	0.511394	0.453893	0.287469	0.496271	0.19554	0.240708	0.425245	0.340787	0.220557	0.284066	0.249118	0.390898	0.321439	0.23102	0.506004	0.34191	0.472019
proline	-0.00678175	1.01067	0.963098	0.987085	1.00255	1.23727	-0.016072	0.873929	0.982638	1.14941	1.21908	1.80903	-0.0175425	-1.70695	-2.38842	-2.8981	-2.61585	-2.31653		0.162021	0.311767	0.284537	0.186304	0.105354	0.325402	0.268944	0.236767	0.100973	0.190841	0.0972864	0.0306832	0.260758	0.261083	0.158317	0.312828	0.12186	0.0992541
valine	-0.028179	-0.379521	-0.321996	-0.233592	-0.0374088	-0.31189	-0.147678	-0.295771	0.114708	-0.0404801	-0.368542	-0.621377	-0.0675825	-0.144532	-0.561763	-0.330705	-0.395104	-0.53811		0.341936	0.444119	0.46953	0.435679	0.164305	0.461317	0.772696	0.394813	0.340154	0.377065	0.485769	0.331149	0.510804	0.342263	0.587122	0.255924	0.363539	0.209746
threonine	-0.014915	-0.0490843	-0.0600955	-0.124042	-0.0830705	0.0153455	-0.148156	-0.122128	0.254244	-0.455808	-0.115332	0.185604	-0.0600865	-0.321475	-0.468985	-0.25883	-0.287027	-0.137765		0.245458	0.388638	0.348754	0.407534	0.113495	0.00898846	0.838325	0.480383	0.103442	0.123812	0.25161	0.185794	0.509487	0.259403	0.291329	0.207146	0.338077	0.299869
leucine/isoleucine	-0.036881	-0.332374	-0.463063	-0.171897	0.0178325	-0.1461	-0.214756	0.103019	0.485417	-0.0398461	0.250464	-0.586991	-0.280087	-0.449305	-1.01985	-0.255295	-0.399425	-0.538257		0.389641	0.707876	0.574774	0.558663	0.247949	0.5047	1.01232	0.332511	0.293329	0.247651	0.259363	0.282702	1.07406	0.702308	0.848455	0.493739	0.453211	0.153579
aspartate	-0.00478975	0.488023	0.219929	-0.452802	-1.18455	-2.033	-0.136474	-0.677063	-0.790931	-1.78239	-1.95351	-3.01335	-0.0540475	0.148346	-0.14269	-0.489855	-1.19488	-1.6213		0.13467	0.329468	0.218513	0.481858	0.271513	0.466501	0.780996	0.448843	0.192368	0.204252	0.212593	0.267507	0.459856	0.298381	0.197341	0.250837	0.408183	0.124549
glutamine	-0.00696125	0.48239	0.710035	1.69895	2.4622	2.70153	-0.251239	0.46678	1.19241	1.58139	2.18752	2.22617	-0.028338	0.592875	1.07498	1.51898	1.7763	1.90737		0.166102	0.280849	0.253153	0.161801	0.16869	0.0721865	1.04768	0.251125	0.128948	0.188953	0.173854	0.243679	0.343458	0.147487	0.0978933	0.163905	0.195759	0.291178
glutamate	-0.00533725	-0.267426	-0.547113	-0.11888	0.102836	0.21913	-0.106212	0.548656	0.666719	0.528569	0.887499	0.597167	-0.0149057	-0.162346	-0.49916	-0.165755	-0.193191	-0.191683		0.143145	0.355506	0.153417	0.105086	0.0374116	0.0308022	0.71887	0.218375	0.0624108	0.177204	0.187308	0.168278	0.244181	0.15632	0.167189	0.053969	0.281605	0.0832076
methionine	-0.0062125	0.159977	-0.00416375	0.0163482	-0.0369898	0.374833	-0.175293	0.148272	0.0756671	-0.217387	-0.023731	-0.117699	-0.152158	-0.57565	-0.789988	-0.508325	-0.480779	-0.299163		0.154791	0.374745	0.407328	0.763464	0.313545	0.210744	0.891196	0.317137	0.214087	0.345487	0.225293	0.481621	0.791877	0.465042	0.570812	0.141757	0.354779	0.149774
guanine	-0.00198372	0.0390483	0.0522006	-0.0171975	0.067576	0.126073	-0.00258622	0.101151	-0.00855714	-0.034321	0.0741735	0.0708078	-0.00738575	-0.0333852	-0.139574	-0.215218	0.00904377	-0.0850167		0.0871694	0.1052	0.176634	0.191142	0.144926	0.024755	0.10509	0.0357778	0.0319251	0.0405112	0.0551762	0.132619	0.170026	0.161257	0.0442592	0.243844	0.0550687	0.13802
histidine	-0.0297803	0.055556	-0.101101	0.64063	0.916365	1.3147	-0.0197742	0.0764318	0.398523	0.514272	0.525558	1.0606	-0.0381495	-0.0557983	0.0831055	0.44865	0.63689	0.713757		0.337846	0.262291	0.122626	0.284746	0.263154	0.0754875	0.288742	0.147322	0.194606	0.30218	0.097974	0.105093	0.393157	0.463459	0.14898	0.238651	0.214288	0.147611
carnitine	-0.000144208	0.368467	0.281848	0.269273	0.321868	0.332087	-0.00696346	-0.00306377	0.00199282	-0.0900786	0.0036809	-0.0942919	-0.00964795	0.0894043	-0.0148383	-0.0664937	0.0542982	-0.031842		0.0235754	0.0401365	0.161302	0.109669	0.0561683	0.0425705	0.171797	0.100646	0.12371	0.172277	0.129049	0.0630354	0.191591	0.0753656	0.122648	0.141906	0.103571	0.10696
phenylalanine	-0.0130025	-0.205827	0.274125	0.674262	1.02572	1.65913	-0.0439326	0.419382	1.06658	1.32496	1.9476	2.28539	-0.125545	-0.453525	-0.0495332	0.598499	1.2075	1.63073		0.227759	0.797847	0.561253	0.482792	0.198049	0.257069	0.449972	0.253732	0.0199182	0.320024	0.258799	0.0644984	0.705032	0.542527	0.186435	0.489276	0.170055	0.105427
tyrosine	-0.0220541	-0.30534	-0.012437	0.023915	0.227282	0.32338	-0.19381	-0.12442	0.269724	-0.138056	0.37497	0.513542	-0.294223	-0.832679	-0.536745	-0.695738	0.407614	0.573313		0.296881	0.578746	0.477303	0.291511	0.254207	0.0578737	0.9276	0.15939	0.173682	0.121512	0.336907	0.0650323	1.18345	0.614013	0.441644	1.20756	0.403478	1.10907
tryptophan	-0.0074405	0.154073	-0.003748	0.171262	0.172299	0.406303	-0.00413164	-0.18373	0.133874	0.18186	0.470905	0.47009	-0.0218384	0.133375	-0.349198	-0.072155	0.162593	0.276093		0.169937	0.396769	0.215268	0.30406	0.14412	0.117284	0.133086	0.209234	0.222821	0.099254	0.1974	0.11356	0.298488	0.149875	0.233152	0.364678	0.145693	0.0688534
alanine	-0.0022015	-3.92437	-3.4487	-3.2232	-3.7151	-3.7433	-0.0754284	-0.208266	0.0822455	0.00783488	-0.0358843	-0.310365	-0.054055	-0.886502	-1.37061	-1.03473	-1.33037	-2.08543		0.0919612	0.440505	0.200217	0.282474	0.405057	0.423307	0.575044	0.419718	0.146892	0.0853629	0.266543	0.367553	0.465638	0.194289	0.308395	0.372819	0.238452	0.152408
fumarate C12	-0.00362802	-1.5022	-1.08244	-0.588898	-0.838707	-1.01312	-0.149263	0.241194	0.339486	0.632625	0.626877	0.719921	-0.0290772	1.05187	1.35465	1.47162	1.21888	1.29256		0.119318	0.439076	0.343001	0.206438	0.241169	0.141263	0.847356	0.484348	0.120113	0.482317	0.202829	0.219899	0.326728	0.160577	0.246245	0.148858	0.08998	0.34377
taurine	-0.0201298	-0.22468	-0.54905	-1.09983	-0.300516	0.611608	-0.271478	0.167882	-0.0508496	-1.23669	-0.662921	-1.06958	-0.0511025	-0.353445	-0.70347	-0.266993	-0.231591	-0.000633333		0.284863	1.07867	1.04462	2.78416	0.711002	0.489992	1.07353	0.798029	1.23251	0.46222	0.679668	2.03525	0.450042	0.393009	0.434977	0.439312	0.672938	0.373955
a-ketoglutarate	-0.03735	1.26817	0.713405	0.958525	1.73333	2.86113	-0.194736	2.40687	2.60685	3.01545	3.72228	4.57524	-0.041242	1.27405	1.24741	1.38863	1.95642	2.42653		0.380039	0.0699189	0.409649	0.249623	0.2828	0.356491	0.924981	0.0799051	0.265535	0.370483	0.121725	0.0681394	0.396344	0.220323	0.338637	0.488361	0.227528	0.214882
phosphoenolpyruvate	-0.640924	2.5519	2.47297	2.22682	2.14375	2.05727	-0.615717	2.74273	2.47646	2.51291	3.02449	2.92073	-0.0282475	1.5503	1.67085	1.53978	1.65645	2.1066		2.00317	0.364254	0.230967	0.138247	0.545901	0.450423	1.90858	0.575733	0.0651661	0.66861	0.211241	0.505566	0.332252	0.282022	0.266583	0.679006	0.29718	0.238982
sn-glycerol-3-phosphate	-0.00989325	-1.13078	-1.2343	-1.00072	-1.08446	-0.985733	-0.0152509	-0.233628	-0.164921	-0.529298	-0.335595	-0.566364	-0.0102405	0.821172	-0.276031	0.60064	0.342236	0.61799		0.195246	0.187324	0.104936	0.222307	0.1483	0.0581684	0.254034	0.118173	0.250142	0.10495	0.277101	0.2747	0.197461	0.323966	0.182555	0.390034	0.289588	0.488678
citrate/isocitrate	-0.00212125	-1.08302	-1.13367	-0.760458	-0.65859	-0.136571	-0.054417	0.0174276	0.227047	0.649408	0.921977	1.20989	-0.129452	0.457268	0.718705	0.757195	0.943708	1.07142		0.0908976	0.309673	0.0951438	0.139033	0.292461	0.0747923	0.499124	0.0654162	0.211484	0.182379	0.243783	0.249566	0.695557	0.343314	0.585138	0.428706	0.735821	1.08182
pantothenate	-0.0044585	-0.107406	-0.0978803	-0.131013	-0.116707	-0.0326484	-0.0338101	-0.106041	-0.166415	-0.0650409	-0.0418692	0.106548	-0.00284575	0.0582361	0.0337322	-0.01371	-0.0474678	-0.101769		0.131435	0.2618	0.220972	0.291376	0.216103	0.172127	0.380123	0.14002	0.135746	0.0943997	0.208937	0.180574	0.10391	0.120561	0.103132	0.165073	0.234006	0.170624
hexose-phosphate	-0.00351662	0.22253	0.231607	0.468365	0.718875	0.887417	-0.0229279	1.05947	1.11288	1.16428	1.60978	1.649	-0.0353345	0.993645	1.09398	1.6965	1.81627	1.967		0.116996	0.047487	0.102559	0.233826	0.36636	0.200619	0.311566	0.345335	0.320824	0.187954	0.0791866	0.231096	0.376962	0.382934	0.327344	0.488205	0.171853	0.250925
fructose-6-phosphate	-0.705095	1.19121	1.2008	1.35118	1.85438	2.62087	-0.145634	1.26211	1.21028	1.31685	2.60727	2.67311	-0.22896	1.57524	2.28673	2.67437	2.96978	3.09707		1.96921	0.491592	0.418111	0.339015	0.533352	0.699173	0.767194	0.471636	0.750523	0.565563	0.5114	0.422667	1.01728	0.76741	0.328981	0.939607	0.227545	0.503467
D-sedoheptulose-7-phosphate	-0.304175	2.02783	1.32074	2.4251	2.8899	3.27323	-0.933636	3.39636	3.24677	3.20877	5.01097	5.07598	-0.0314025	2.19552	2.70213	3.505	3.69645	4.23817		1.13032	0.306172	0.495391	0.231153	0.45545	0.127264	1.9728	0.849505	0.666074	0.280184	0.152302	0.404469	0.348549	1.02474	0.991686	0.763685	0.248522	0.332557
glutathione-nega	-0.009556	-0.0425967	-0.130971	-0.0672399	0.0283052	0.0677057	-0.0215127	-0.0951627	-0.0719339	-0.141357	-0.230481	0.0877435	-0.0059775	0.0269793	-0.0989803	-0.0192688	-0.142996	-0.150717		0.19278	0.218772	0.217363	0.195728	0.211898	0.0825064	0.301797	0.282986	0.133277	0.260296	0.183527	0.0474291	0.151817	0.120157	0.140475	0.233979	0.284082	0.529422
trehalose	-0.00164975	0.142798	-0.0268038	0.064785	0.0193482	-0.270235	-0.0405774	-0.161698	-0.262251	-0.136745	-0.410849	-0.119215	-0.002811	-0.107127	-0.0986613	-0.291832	-0.13243	-0.0305587		0.0790256	0.210489	0.316252	0.271212	0.21178	0.219314	0.423753	0.168814	0.358349	0.0843833	0.287774	0.30747	0.104046	0.2195	0.203452	0.369658	0.160046	0.129793
5-phosphoribosyl 1-pyrophosphate	-0.05833	-0.0406943	-0.90607	-1.67572	-1.65748	-1.34924	-0.00939529	-1.04637	-2.36325	-2.28819	-3.87585	-2.47303	-0.0272375	-0.61047	-0.766769	-1.81235	-1.70625	-0.79399		0.476198	0.782855	0.371525	1.6981	0.681454	0.475799	0.203233	0.2602	0.331371	0.709972	0.720903	0.128016	0.328681	0.414802	0.548442	0.393785	0.262322	0.180314
ADP-nega	-0.00359625	0.0581133	0.0460318	0.0502057	0.123646	0.172207	-0.0397874	0.0888893	0.0843597	-0.00270611	-0.110166	0.103413	-0.015835	0.138827	-0.111396	0.384665	0.288601	0.0363633		0.117775	0.271258	0.0706102	0.134753	0.124902	0.0193138	0.407296	0.0901789	0.172627	0.190792	0.595716	0.5616	0.246635	0.273728	0.378502	0.102635	0.245752	0.364175
dCTP-nega	-0.002509	0.586023	0.96113	1.06855	0.87129	0.586747	-0.0715565	0.05533	0.0183413	-0.0883365	-0.94121	-1.24958	-0.0236597	0.639545	0.831585	0.96197	0.98252	1.6267		0.098349	0.158279	0.189337	0.0361649	0.139927	0.0271615	0.541599	0.197432	0.358974	0.186865	0.417915	0.630379	0.306887	0.0584801	0.0465901	0.15419	0.152404	0.0777636
dTTP-nega	-0.00125775	0.353997	0.58193	0.914865	1.32163	0.881297	-0.119348	-0.149292	0.261732	0.568877	0.526317	-0.311049	-0.0174482	0.147345	0.18024	0.765895	0.288775	0.287541		0.0696023	0.22566	0.190014	0.142783	0.11301	0.16806	0.69877	0.393733	0.384576	0.149157	0.452633	0.499873	0.255228	0.168426	0.280216	0.112459	0.318902	0.211792
UTP-nega	-0.00349925	-0.09849	-0.369255	-0.539335	-0.559748	-0.748317	-0.0247745	-0.741301	-0.912937	-1.04029	-1.37158	-1.50942	-0.0030236	-0.203634	-0.332398	-0.432748	-0.517088	-0.538487		0.115794	0.260671	0.123172	0.203392	0.14275	0.1747	0.321467	0.265791	0.191244	0.162437	0.320741	0.384742	0.108518	0.11975	0.0951952	0.187108	0.154005	0.222012
dATP-nega	-0.00154785	0.429967	0.594832	0.982712	0.76682	0.36298	-0.0930497	0.150042	0.556283	0.675696	0.00940297	-0.551453	-0.00280375	0.215928	0.34485	0.59262	0.0111637	-0.462283		0.0771091	0.12693	0.155963	0.207213	0.186659	0.0706463	0.618477	0.361221	0.272327	0.0809548	0.330753	0.291908	0.10375	0.192357	0.0910309	0.0826414	0.247441	0.0763147
ATP-nega	-0.00207855	0.13868	0.0381367	0.0950304	0.188348	0.083528	-0.0315509	-0.166151	-0.152309	-0.0690664	-0.275644	-0.298653	-0.00370525	0.0320962	-0.0263431	0.0567465	0.0775336	0.0948397		0.0900145	0.150295	0.120729	0.156728	0.179191	0.0758464	0.363665	0.107665	0.136419	0.108948	0.357492	0.401096	0.118906	0.116914	0.094265	0.122702	0.064079	0.101326
UDP-D-glucose	-0.00331625	-0.11211	-0.252155	-0.117138	-0.00920325	-0.00557667	-0.0233581	-0.144625	-0.0449923	-0.00288258	0.106063	0.0488161	-0.000527025	0.0614768	0.0805568	0.178529	0.24401	0.0659133		0.113119	0.283558	0.119408	0.149616	0.160951	0.219745	0.312243	0.138607	0.0120504	0.101135	0.153595	0.099399	0.0451014	0.073358	0.0419123	0.196744	0.0803254	0.207715
UDP-D-glucuronate	-0.0010237	0.797303	0.99393	1.22297	1.3903	1.40117	-0.0165734	0.664106	0.814555	1.01947	1.06781	1.0994	-0.00978225	0.843245	0.976198	1.1589	1.32475	1.3255		0.0629172	0.176867	0.141139	0.0656316	0.071515	0.110379	0.264113	0.178351	0.0627592	0.0936617	0.0706574	0.125387	0.1954	0.0458476	0.0772746	0.18727	0.110782	0.177464
UDP-N-acetyl-glucosamine	-0.003374	0.0964683	0.05075	0.142706	0.218327	0.185649	-0.0833669	-0.211203	-0.217868	-0.263492	-0.145128	-0.27386	-0.012935	-0.040542	-0.135738	0.0292128	0.0227737	-0.0245997		0.114563	0.247	0.148695	0.161144	0.120066	0.155768	0.583146	0.228029	0.295299	0.100305	0.147851	0.19457	0.22262	0.18696	0.211659	0.171294	0.232359	0.263228
glutathione disulfide-nega	-0.04025	0.079698	-0.141243	-0.420372	-0.212379	-0.631767	-0.0971169	-0.0501798	0.150496	-0.400205	0.00543128	-0.262692	-0.00459525	-0.247711	-0.58132	-0.33478	-0.421115	-0.37315		0.382736	0.229438	0.342596	0.812	0.333103	0.406399	0.640796	0.471727	0.341606	0.511501	0.673265	0.474116	0.131823	0.25495	0.764494	0.131389	0.0894943	0.150993
NAD+_nega	-0.0066385	0.171899	-0.00999325	0.129011	0.0874505	0.199534	-0.00928568	-0.0665595	-0.172147	-0.113319	-0.148102	-0.188733	-0.00119775	0.0917958	-0.0326155	-0.0751245	-0.0858935	-0.099726		0.162375	0.244428	0.188295	0.252504	0.0767078	0.262442	0.198065	0.133193	0.195816	0.121602	0.259846	0.357749	0.0678412	0.135908	0.020076	0.242372	0.228787	0.313133
NADH_nega	-0.0164262	-1.2558	-1.0366	-0.267285	-0.305018	-0.23841	-0.0158674	-0.718409	-0.494724	-0.254908	-0.0137142	-0.0613791	-0.00811953	-0.29073	-0.484177	-0.119872	-0.376578	-0.171739		0.247725	0.0225734	0.250682	0.352741	0.213986	0.114188	0.262061	0.139759	0.20283	0.183375	0.0324705	0.153732	0.179631	0.276206	0.275225	0.280209	0.154697	0.189793
NADP+_nega	-0.075905	0.393183	-0.335132	-1.09684	-0.33475	-0.25764	-0.0209909	0.169871	-0.40885	-0.256466	-0.312686	-0.884552	-0.0369272	-0.78192	-0.797765	-0.828298	-0.57611	-0.816067		0.547837	0.246985	0.74882	0.139457	0.266027	1.19653	0.29646	0.0281855	0.477579	0.0921622	0.398567	0.286384	0.374517	0.34469	0.309414	0.4253	0.259163	0.244711
NADPH_nega	-0.00498125	0.275077	0.0953937	-0.0292695	0.13128	0.29916	-0.00713032	0.0766955	-0.0653264	0.0618872	-0.0565613	0.109313	-0.0415125	-0.0220625	-0.0528648	-0.1065	0.110526	-0.0601951		0.13928	0.0969747	0.145804	0.161694	0.222591	0.28938	0.174928	0.0978183	0.214824	0.144442	0.259424	0.0764217	0.405923	0.221326	0.162245	0.111785	0.068775	0.0605691
acetyl-CoA-nega	-0.101065	-0.102817	0.570298	-0.232592	0.427233	0.446187	-0.0717818	-1.06046	-0.810925	-0.451948	-0.675982	-0.173103	-0.0241125	-0.136845	-0.448085	0.476592	0.513147	0.689253		0.590049	0.756399	0.188544	0.493744	0.843287	0.323955	0.566752	0.372383	0.672469	0.707748	0.875197	0.547059	0.304092	0.289546	0.491428	0.294097	0.215062	0.428865
malate_0	-0.00728335	-0.69127	-0.416302	-0.23698	-0.42866	-0.373567	-0.0995134	0.189049	0.239152	0.372506	0.469746	0.375875	-0.0544613	1.1133	1.4248	1.44213	1.30863	1.19761		0.167704	0.201906	0.141046	0.084214	0.0661042	0.239691	0.687744	0.194346	0.169051	0.0894268	0.162561	0.306478	0.451972	0.143193	0.135255	0.179458	0.095535	0.417073
fructose-1,6-bisphosphate	-0.161957	0.28906	0.295207	0.35116	0.08017	-0.296261	-0.422525	-0.0131821	-0.372377	0.102395	-0.534517	-2.002	-0.050035	0.102262	-0.137485	-0.549171	-0.468185	-0.614431		0.799068	0.4779	0.559331	0.457473	0.641128	0.325611	1.36618	0.542682	0.150663	0.985379	0.329329	0.792564	0.437266	0.168277	0.659185	0.465317	0.479926	0.81752
1,3-diphosphateglycerate	-0.150202	1.77467	1.85808	1.41066	1.09879	0.724943	-0.0197556	-1.34994	-1.19955	-1.43167	-1.7697	0.128837	-0.149121	2.35988	2.49683	2.15623	1.6954	1.9529		0.771271	0.330374	0.460144	0.346456	0.346693	0.198603	0.289789	0.538376	1.12751	0.823346	0.42594	1.22659	0.744712	0.0276973	0.125277	0.266241	0.433766	0.520293
On three different days, three different male/female pairs were bred in vitro to obtain clutches of unfertilized eggs (time=0) and early embryos at various times post-fertilization (pf) at18°C. Single eggs or embryos were rapidly quenched, extracted, and subjected to metabolomic analysis. Metabolite levels were expressed relative to the average value for that metabolite in the egg samples. The ra…
